# Supplementary material for: Penicillin Allergy as an Instrumental Variable for Estimating Antibiotic Effects on Resistance
Source: bioRxiv or medRxiv preprint supplement (doi:10.1101/2024.08.19.24312204), 2025-01-09

# Appendix

Figure S1: Assumed causal model in DAG with named covariates.

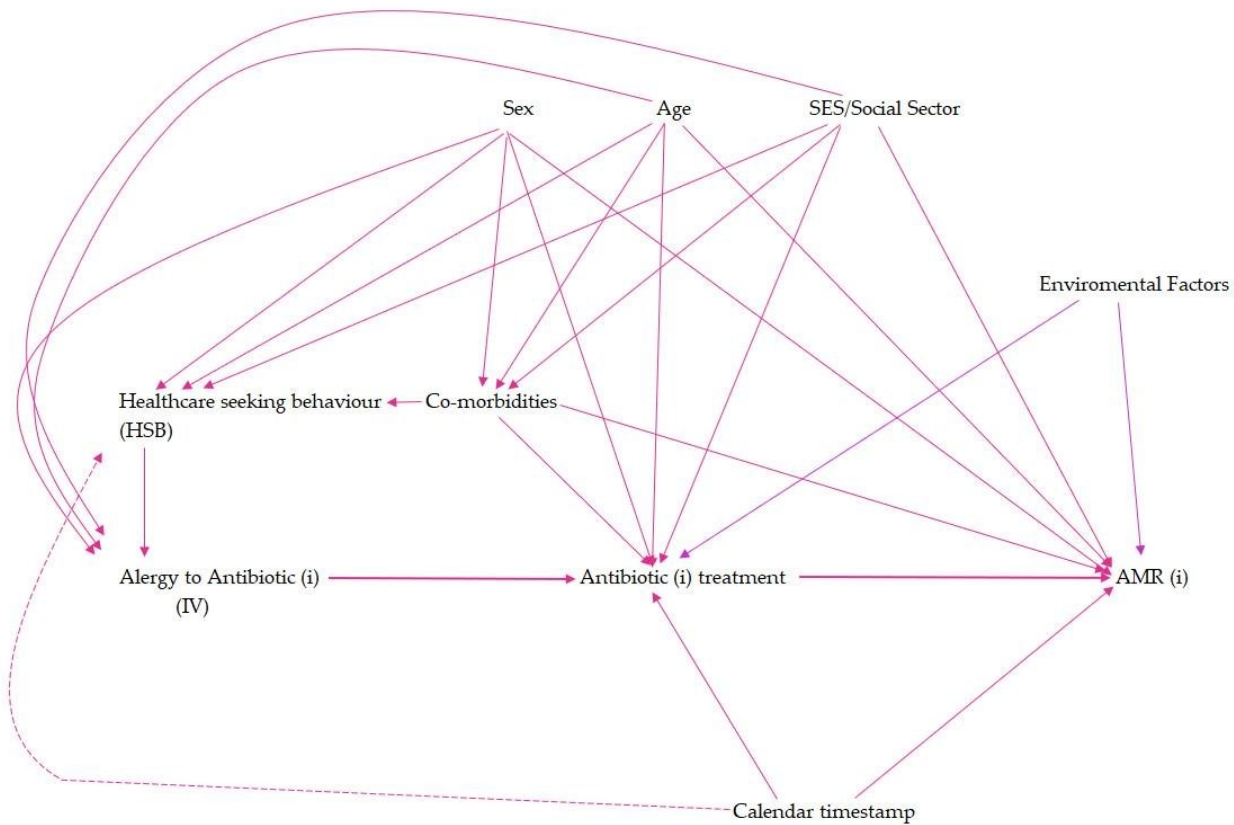

Table S1: Probability of being uncensored in the primary study population.

|                                    | Status     | N       | Min.  | 1st Qu. | Median | Mean  | 3rd Qu. | Max.   |
|------------------------------------|------------|---------|-------|---------|--------|-------|---------|--------|
| Ampicillin                         | uncensored | 32006   | 0.09% | 0.97%   | 1.77%  | 2.24% | 2.91%   | 18.66% |
|                                    | censored   | 3077087 | 0.00% | 0.15%   | 0.84%  | 1.02% | 1.28%   | 20.35% |
| Amoxicillin/<br>clavulanic<br>acid | uncensored | 18797   | 0.05% | 0.56%   | 1.13%  | 1.37% | 1.86%   | 11.10% |
|                                    | censored   | 3090296 | 0.00% | 0.08%   | 0.48%  | 0.60% | 0.71%   | 11.13% |
| Piperacillin/<br>Tazobactam        | uncensored | 37295   | 0.09% | 1.12%   | 2.13%  | 2.71% | 3.61%   | 23.87% |
|                                    | censored   | 3071798 | 0.00% | 0.17%   | 0.94%  | 1.18% | 1.43%   | 24.99% |
| Gentamicin                         | uncensored | 41317   | 0.11% | 1.24%   | 2.36%  | 2.95% | 3.86%   | 23.62% |
|                                    | censored   | 3067776 | 0.00% | 0.19%   | 1.06%  | 1.31% | 1.59%   | 25.41% |

|               |            |         |       |       |       |       |       |        |
|---------------|------------|---------|-------|-------|-------|-------|-------|--------|
| Ciprofloxacin | uncensored | 37516   | 0.10% | 1.12% | 2.14% | 2.65% | 3.47% | 21.95% |
|               | censored   | 3071577 | 0.00% | 0.18% | 0.96% | 1.19% | 1.45% | 23.52% |

Table S2: First Stage Regression Coefficients for IV Estimation

|               | <i>Ampicillin</i> | <i>Amoxicillin/clavulanic acid</i> | <i>Piperacillin/tazobactam</i> | <i>Gentamicin</i>    |
|---------------|-------------------|------------------------------------|--------------------------------|----------------------|
|               | <i>Beta(s.e.)</i> | <i>Beta(s.e.)(1)</i>               | <i>Beta(s.e.)(1)</i>           | <i>Beta(s.e.)(1)</i> |
| IV            | 0.23***           | 0.22***                            | 0.23***                        | 0.23***              |
| t-statistics: | 29.5              | 21.5                               | 31.4                           | 32.8                 |

\*\*\* p-value < 0.001, \*\* -val < 0.01, \* p-value 0.05

(1) Adjusted for sex, age, ses, social sector, comorbidities (ckd, cardio-vascular disease, diabetes mellitus, hypertension a immunosuppression), calendar time, previous urine culture tests count and previous antibiotic uses count

Table S3: IV-Estimated Risk Differences of AMR Rates: A Comparison between Exposure to Penicillins and Other Antibiotics Across Varying Time Points Post-Exposure, Limited to Amoxicillin, Amoxicillin without Other Penicillins, and Amoxicillin with Other Penicillins

| Penicillin                      | AMR Antibiotic                 | Follow up length | Number of AMR Tests | RD IV (1)(2) | 2.50% | 97.50% | NNH |
|---------------------------------|--------------------------------|------------------|---------------------|--------------|-------|--------|-----|
|                                 |                                | Up to: 90 days   | 6455                | 52.7%        | 31.8% | 79.8%  | 1.9 |
| Amoxicillin/clavu<br>lanic acid | Amoxicillin/clavulanic<br>acid | Up to: 180 days  | 10362               | 37.4%        | 22.0% | 53.1%  | 2.7 |
|                                 |                                | Up to: 270 days  | 13226               | 28.5%        | 15.4% | 41.1%  | 3.5 |
|                                 |                                | Up to: 365 days  | 15356               | 25.5%        | 14.5% | 37.1%  | 3.9 |

|                             |                 |       |       |        |       |       |
|-----------------------------|-----------------|-------|-------|--------|-------|-------|
|                             | Up to: 90 days  | 11238 | 29.8% | 3.9%   | 56.1% | 3.4   |
|                             | Up to: 180 days | 17510 | 24.0% | 3.9%   | 42.8% | 4.2   |
| Ampicillin                  | Up to: 270 days | 21918 | 15.3% | -0.2%  | 31.9% | 6.6   |
|                             | Up to: 365 days | 25253 | 14.8% | 1.2%   | 28.7% | 6.8   |
|                             | Up to: 90 days  | 12655 | 4.6%  | 1.8%   | 7.2%  | 22.0  |
|                             | Up to: 180 days | 20111 | 3.4%  | 1.5%   | 5.3%  | 29.6  |
| Piperacillin/Tazobactam     | Up to: 270 days | 25611 | 1.8%  | 0.2%   | 3.5%  | 55.6  |
|                             | Up to: 365 days | 29865 | 1.3%  | -0.1%  | 3.0%  | 74.6  |
|                             | Up to: 90 days  | 14356 | 1.5%  | -10.8% | 13.9% | 65.8  |
|                             | Up to: 180 days | 22629 | 1.2%  | -7.8%  | 9.8%  | 85.5  |
| Gentamicin                  | Up to: 270 days | 28524 | 0.1%  | -6.3%  | 6.2%  | 714.3 |
|                             | Up to: 365 days | 33006 | 2.5%  | -3.9%  | 8.3%  | 40.2  |
|                             | Up to: 90 days  | 6459  | 48.3% | 25.7%  | 72.3% | 2.1   |
|                             | Up to: 180 days | 10540 | 32.2% | 16.2%  | 46.3% | 3.1   |
| Amoxicillin/clavulanic acid | Up to: 270 days | 13464 | 24.7% | 13.7%  | 36.3% | 4.1   |
|                             | Up to: 365 days | 15684 | 22.5% | 12.2%  | 32.4% | 4.4   |
| Amoxicillin                 | Up to: 90 days  | 11731 | 28.4% | 9.8%   | 48.0% | 3.5   |
|                             | Up to: 180 days | 18396 | 22.4% | 7.4%   | 39.2% | 4.5   |
| Ampicillin                  | Up to: 270 days | 23049 | 17.6% | 4.3%   | 31.0% | 5.7   |
|                             | Up to: 365 days | 26585 | 18.1% | 4.6%   | 29.8% | 5.5   |

|                            |                             |                 |       |       |        |       |        |
|----------------------------|-----------------------------|-----------------|-------|-------|--------|-------|--------|
|                            |                             | Up to: 90 days  | 13106 | 2.8%  | 0.8%   | 4.7%  | 35.7   |
|                            |                             | Up to: 180 days | 20960 | 2.4%  | 1.0%   | 3.8%  | 42.6   |
|                            | Piperacillin/Tazobactam     | Up to: 270 days | 26710 | 1.5%  | -0.1%  | 2.9%  | 67.6   |
|                            |                             | Up to: 365 days | 31197 | 1.1%  | -0.2%  | 2.4%  | 87.7   |
|                            |                             | Up to: 90 days  | 14889 | -1.3% | -11.5% | 7.2%  | -76.9  |
|                            |                             | Up to: 180 days | 23591 | -1.5% | -9.1%  | 6.1%  | -67.6  |
|                            | Gentamicin                  | Up to: 270 days | 29772 | -1.0% | -7.0%  | 4.7%  | -100.0 |
|                            |                             | Up to: 365 days | 34494 | 1.4%  | -3.9%  | 6.1%  | 73.5   |
|                            |                             | Up to: 90 days  | 6705  | 39.2% | 21.0%  | 57.9% | 2.5    |
|                            |                             | Up to: 180 days | 10998 | 26.0% | 15.1%  | 38.4% | 3.8    |
|                            | Amoxicillin/clavulanic acid | Up to: 270 days | 14103 | 20.7% | 10.2%  | 30.0% | 4.8    |
|                            |                             | Up to: 365 days | 16468 | 18.4% | 10.4%  | 26.6% | 5.4    |
|                            |                             | Up to: 90 days  | 12219 | 25.4% | 6.6%   | 42.8% | 3.9    |
|                            |                             | Up to: 180 days | 19236 | 19.6% | 6.8%   | 31.8% | 5.1    |
| Amoxicillin and Penicillin | Ampicillin                  | Up to: 270 days | 24161 | 14.9% | 3.7%   | 26.5% | 6.7    |
|                            |                             | Up to: 365 days | 27943 | 15.0% | 5.9%   | 24.7% | 6.7    |
|                            |                             | Up to: 90 days  | 13612 | 2.1%  | 0.1%   | 3.6%  | 47.4   |
|                            |                             | Up to: 180 days | 21871 | 1.8%  | 0.3%   | 3.0%  | 56.8   |
|                            | Piperacillin/Tazobactam     | Up to: 270 days | 27953 | 1.1%  | -0.2%  | 2.3%  | 92.6   |
|                            |                             | Up to: 365 days | 32735 | 0.9%  | -0.3%  | 2.1%  | 108.7  |

|            |                 |       |       |        |      |       |
|------------|-----------------|-------|-------|--------|------|-------|
| Gentamicin | Up to: 90 days  | 15489 | -1.6% | -10.0% | 6.1% | -62.5 |
|            | Up to: 180 days | 24640 | -2.0% | -8.8%  | 4.4% | -50.0 |
|            | Up to: 270 days | 31179 | -1.3% | -5.7%  | 3.7% | -75.8 |
|            | Up to: 365 days | 36214 | 1.0%  | -3.8%  | 5.5% | 105.3 |

Table S4: IV-Estimated Risk Differences Across AMR Test Strata: Pairwise Comparisons of penicillin vs. Other Antibiotic Groups Within 180 Days Post-Exposure

| AMR Antibiotic              | Antibiotic Group Comparison | Number of AMR Tests | RD IV (1)(2) | C.I   |       | NNH  |
|-----------------------------|-----------------------------|---------------------|--------------|-------|-------|------|
|                             |                             |                     |              | 2.5%  | 97.5% |      |
| Amoxicillin/clavulanic acid | Cephalosporins              | 6420                | 12.0%        | -8.5% | 27.0% | 8.4  |
|                             | Macrolides                  | 4532                | 13.2%        | 7.5%  | 19.1% | 7.6  |
|                             | Tetracyclines               | 4918                | 15.3%        | 4.1%  | 24.8% | 6.5  |
|                             | Trimeth-sulfa               | 3695                | 24.5%        | -3.5% | 52.8% | 4.1  |
|                             | Fosfomycin Trometamol       | 3770                | 31.6%        | 7.1%  | 61.8% | 3.2  |
|                             | Nitrofurantoin              | 5181                | 18.4%        | 6.6%  | 32.0% | 5.4  |
| Ampicillin                  | Cephalosporins              | 11670               | 1.8%         | -9.7% | 16.7% | 56.8 |
|                             | Macrolides                  | 8683                | 22.3%        | 16.7% | 28.7% | 4.5  |
|                             | Tetracyclines               | 10003               | 8.1%         | -2.2% | 17.1% | 12.4 |
|                             | Trimeth-sulfa               | 7360                | 40.1%        | 6.6%  | 71.1% | 2.5  |
|                             | Fosfomycin Trometamol       | 7582                | 29.5%        | 4.6%  | 59.2% | 3.4  |

|                         |                       |       |       |        |       |        |
|-------------------------|-----------------------|-------|-------|--------|-------|--------|
|                         | Nitrofurantoin        | 9506  | 21.5% | 3.1%   | 39.8% | 4.6    |
| Piperacillin/Tazobactam | Cephalosporins        | 12791 | 1.5%  | 0.0%   | 3.1%  | 67.1   |
|                         | Macrolides            | 9390  | 1.3%  | 0.5%   | 2.0%  | 75.8   |
|                         | Tetracyclines         | 10564 | 2.6%  | 1.4%   | 3.7%  | 39.1   |
|                         | Trimeth-sulfa         | 7799  | 3.5%  | -0.6%  | 8.1%  | 28.4   |
|                         | Fosfomycin Trometamol | 8033  | 1.8%  | -3.9%  | 6.6%  | 55.6   |
|                         | Nitrofurantoin        | 10627 | 2.0%  | -0.3%  | 4.0%  | 49.0   |
| Gentamicin              | Cephalosporins        | 14591 | -3.3% | -11.2% | 3.1%  | -30.6  |
|                         | Macrolides            | 10714 | -1.0% | -4.4%  | 2.1%  | -102.0 |
|                         | Tetracyclines         | 12291 | -4.9% | -11.0% | 1.9%  | -20.4  |
|                         | Trimeth-sulfa         | 8954  | -8.4% | -29.9% | 8.0%  | -12.0  |
|                         | Fosfomycin Trometamol | 9225  | -9.3% | -30.7% | 4.6%  | -10.7  |
|                         | Nitrofurantoin        | 11881 | -4.2% | -12.5% | 4.1%  | -23.9  |

(1) Weighted with inverse probability of censoring (IPCW) weights

(2) Adjusted for sex, age, ses, social sector, comorbidities (ckd, cardio-vascular disease, diabetes mellitus, hypertension and immunosuppression), calendar time, previous urine culture tests count and pervious antibiotic uses count

\* The negative NNH is interpreted as the absolute value of the NNH when switching the penicillins to be the comparator group.

Figure S2: Resistance Trends of Selected Antibiotics Against *E. coli* in Urine Cultures 2013-2022, MHS

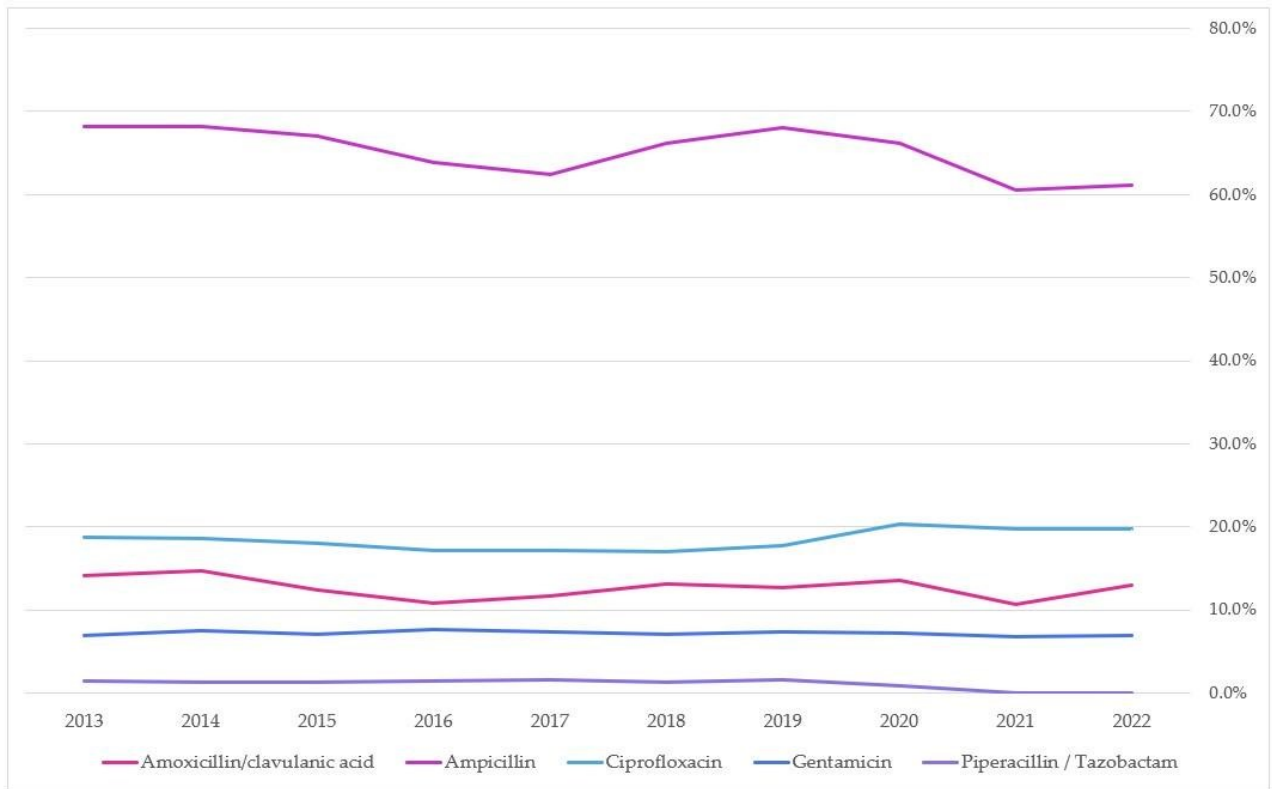

Supplement: Supplementary file [file media-1.pdf]
